# Supplementary material for: Epigenetic reprogramming, gene expression and in vitro development of porcine SCNT embryos are significantly improved by a histone deacetylase inhibitor—m-carboxycinnamic acid bishydroxamide (CBHA)
Source: PubMed Central journal article supplement (PMC3996156; doi:10.1007/s13238-014-0034-3), 2014-03-14
Supplement: 13238_2014_34_MOESM1_ESM.pdf [file 13238_2014_34_MOESM1_ESM.pdf]

Table S1. Primer sequence for RT-PCR and Q-PCR

| <b>Gene name</b>                 | <b>Forward primers</b> | <b>Reverse primers</b> |
|----------------------------------|------------------------|------------------------|
| <b>CDX2</b>                      | CGGAACCTGTGCGAGTGGA    | TGCCAGCTCGGCCTTTCT     |
| <b>HDAC2</b>                     | ACAGGAGACTTGAGGGAT     | CACATTTAGCGTGACCTT     |
| <b>IGF2</b>                      | GTGCTGCTATGCTGCTTACCG  | CCGCAGACAAACTGGAGGG    |
| <b>IGF2R</b>                     | CGGAGTTCAGCCACGAGA     | CACCAGCAGCAGACTAAGGAT  |
| <b>POU5F1</b>                    | G TTCAGCCAAACGACCATCT  | CTCTGCCTTGCATATCTCCTG  |
| <b><math>\beta</math> -actin</b> | TGCTGTCCCTGTACGCCTCTG  | ATGTCCC GCACGATCTCCC   |
